# Supplementary material for: Associations between Screen-Based Activities, Physical Activity, and Dietary Habits in Mexican Schoolchildren
Source: MDPI journal article supplement (doi:10.3390/ijerph18136788), 2021-06-24
Supplement: s1 [file s1]

**Table S3.** Correlates for TV watching, video game, and computer use across sex in complete sample.

| Television Viewing                              |                  |              |                 |              | Video Game Use   |              |                 |              | Computer Use     |              |                 |              |              |
|-------------------------------------------------|------------------|--------------|-----------------|--------------|------------------|--------------|-----------------|--------------|------------------|--------------|-----------------|--------------|--------------|
|                                                 | Girls<br>(n=449) |              | Boys<br>(n=439) |              | Girls<br>(n=907) |              | Boys<br>(n=791) |              | Girls<br>(n=449) |              | Boys<br>(n=791) |              |              |
|                                                 | OR               | (95% CI)     | OR              | (95% CI)     | OR               | (95% CI)     | OR              | (95% CI)     | OR               | (95% CI)     | OR              | (95% CI)     |              |
| Gender                                          |                  |              |                 |              |                  |              |                 |              |                  |              |                 |              |              |
|                                                 | Girls            |              |                 |              |                  |              |                 |              |                  |              |                 |              |              |
|                                                 | Boys             |              |                 |              |                  |              |                 |              |                  |              |                 |              |              |
| Age (years)                                     | 0.96             | (0.83, 1.12) | 1.04            | (0.84, 1.28) | 1.17             | (0.94, 1.47) | 1.13            | (0.95, 1.34) | 1.26             | (1.04, 1.52) | 1.30            | (1.13, 1.49) |              |
| Active transportation                           |                  |              |                 |              |                  |              |                 |              |                  |              |                 |              |              |
|                                                 | No               | 1.00         | ----            | 1.00         | ----             | 1.00         | ----            | 1.00         | ----             | 1.00         | ----            | 1.00         | ----         |
|                                                 | Yes              | 1.38         | (1.02, 1.88)    | 1.38         | (0.91, 2.09)     | 0.78         | (0.55, 1.11)    | 0.88         | (0.62, 1.25)     | 0.74         | (0.48, 1.12)    | 0.56         | (0.41, 0.77) |
| Days of outdoor play                            | 0.92             | (0.83, 1.02) | 0.97            | (0.90, 1.05) | 1.03             | (0.96, 1.12) | 0.97            | (0.90, 1.04) | 1.01             | (0.94, 1.09) | 1.01            | (0.71, 1.45) |              |
| Participation in organized activities or sports |                  |              |                 |              |                  |              |                 |              |                  |              |                 |              |              |
|                                                 | No               | 1.00         | ----            | 1.00         | ----             | 1.00         | ----            | 1.00         | ----             | 1.00         | ----            | 1.00         | ----         |
|                                                 | Yes              | 0.81         | (0.61, 1.09)    | 0.58         | (0.38, 0.88)     | 1.71         | (1.21, 2.42)    | 1.05         | (0.70, 1.59)     | 0.90         | (0.60, 1.27)    | 1.02         | (0.71, 1.45) |
| Healthy food index score                        | 0.84             | (0.73, 0.95) | 0.85            | (0.75, 0.96) | 0.89             | (0.75, 1.06) | 0.83            | (0.76, 0.91) | 0.94             | (0.81, 1.10) | 0.95            | (0.84, 1.08) |              |
| Unhealthy food index score                      | 1.25             | (1.06, 1.48) | 1.36            | (1.12, 1.65) | 1.24             | (1.03, 1.49) | 1.53            | (1.25, 1.88) | 1.17             | (1.04, 1.32) | 1.16            | (0.94, 1.43) |              |
| Household income                                |                  |              |                 |              |                  |              |                 |              |                  |              |                 |              |              |
| Less than 5,000 MXN                             | 1.00             | ----         | 1.00            | ----         | 1.00             | ----         | 1.00            | ----         | 1.00             | ----         | 1.00            | ----         |              |
| \$5,000 - \$9,999.99 MXN                        | 1.38             | (0.90, 2.11) | 1.77            | (1.23, 2.56) | 2.39             | (1.40, 4.08) | 1.78            | (1.31, 2.43) | 1.71             | (1.21, 2.42) | 2.00            | (1.32, 3.54) |              |
| 10,000 or more MXN                              | 1.94             | (1.10, 3.42) | 1.42            | (0.70, 2.88) | 4.43             | (2.26, 8.7)  | 2.43            | (1.49, 4.00) | 3.49             | (2.39, 5.12) | 5.12            | (3.07, 8.54) |              |
| p trend                                         | 0.018            |              | 0.080           |              | <0.001           |              | <0.001          |              | <0.001           |              | <0.001          |              |              |

OR= Odds Ratio; CI= Confidence Interval

Numbers in **bold** indicate significant differences between boys and girls.

<sup>a</sup>Odds ratio calculated using an ordinal regression model.

<sup>b</sup>Odds ratio calculated using multiple imputation ordinal regression model.
