# Supplementary material for: Associations between Screen-Based Activities, Physical Activity, and Dietary Habits in Mexican Schoolchildren
Source: MDPI journal article supplement (doi:10.3390/ijerph18136788), 2021-06-24
Supplement: s1 [file s1]

**Table S2.** Correlates for TV watching, video game, and computer use among complete information sample.

|                                                        | TV Watching  |                     | Video Game Use   |                     | Computer Use     |                     |
|--------------------------------------------------------|--------------|---------------------|------------------|---------------------|------------------|---------------------|
|                                                        | OR           | (95% CI)            | OR               | (95% CI)            | OR               | (95% CI)            |
| <b>Gender</b>                                          |              |                     |                  |                     |                  |                     |
| <b>Girls</b>                                           | 1.00         | ----                | 1.00             | ----                | 1.00             | ----                |
| <b>Boys</b>                                            | 1.20         | (0.90, 1.60)        | <b>4.68</b>      | <b>(3.36, 6.51)</b> | 1.13             | (0.88, 1.48)        |
| <b>Age (years)</b>                                     | 1.00         | (0.87, 1.14)        | <b>1.13</b>      | <b>(1.02, 1.25)</b> | <b>1.24</b>      | <b>(1.14, 1.41)</b> |
| <b>Active transportation</b>                           |              |                     |                  |                     |                  |                     |
| <b>No</b>                                              | 1.00         | ----                | 1.00             | ----                | 1.00             | ----                |
| <b>Yes</b>                                             | <b>1.36</b>  | <b>(1.08, 1.73)</b> | 0.80             | (0.60, 1.08)        | 0.64             | (0.48, 0.87)        |
| <b>Days of outdoor play</b>                            | 0.95         | (0.89, 1.01)        | 0.98             | (0.93, 1.03)        | 1.01             | (0.95, 1.07)        |
| <b>Participation in organized activities or sports</b> |              |                     |                  |                     |                  |                     |
| <b>No</b>                                              | 1.00         | ----                | 1.00             | ----                | 1.00             | ----                |
| <b>Yes</b>                                             | 0.70         | (0.53, 0.91)        | 1.28             | (0.93, 1.78)        | 0.94             | (0.73, 1.20)        |
| <b>Healthy food pattern (score)</b>                    | <b>0.84</b>  | <b>(0.77, 0.92)</b> | <b>0.86</b>      | <b>(0.79, 0.94)</b> | 0.95             | (0.86, 1.05)        |
| <b>Unhealthy food pattern (score)</b>                  | <b>1.29</b>  | <b>(1.13, 1.48)</b> | <b>1.41</b>      | <b>(1.22, 1.63)</b> | <b>1.17</b>      | <b>(1.04, 1.32)</b> |
| <b>Household income</b>                                |              |                     |                  |                     |                  |                     |
| <b>Less than 5,000 MXN</b>                             | 1.00         | ----                | 1.00             | ----                | 1.00             | ----                |
| <b>\$5,000 - \$9,999.99 MXN</b>                        | <b>1.56</b>  | <b>(1.20, 2.02)</b> | <b>1.94</b>      | <b>(1.43, 2.64)</b> | <b>1.71</b>      | <b>(1.21, 2.42)</b> |
| <b>10,000 or more MXN</b>                              | <b>1.75</b>  | <b>(1.07, 2.87)</b> | <b>3.21</b>      | <b>(2.14, 4.81)</b> | <b>3.49</b>      | <b>(2.39, 5.12)</b> |
| <b><i>p trend</i></b>                                  | <b>0.005</b> |                     | <b>&lt;0.001</b> |                     | <b>&lt;0.001</b> |                     |

OR= Odds Ratio; CI= Confidence Interval

Numbers in **bold** indicate significant differences between boys and girls.

<sup>a</sup> Odds ratio calculated using an ordinal regression model.

<sup>b</sup> Odds ratio calculated using multiple imputation ordinal regression model.
