# Supplementary material for: Associations between Screen-Based Activities, Physical Activity, and Dietary Habits in Mexican Schoolchildren
Source: MDPI journal article supplement (doi:10.3390/ijerph18136788), 2021-06-24
Supplement: s1 [file s1]

Table S1. Descriptive characteristics of complete information sample.

| Complete information sample (n=874) |              |         |           |         |           |         |
|-------------------------------------|--------------|---------|-----------|---------|-----------|---------|
|                                     | Total sample |         | Girls     |         | Boys      |         |
|                                     | n or mean    | % or SD | n or mean | % or SD | n or mean | % or SD |
| <b>N</b>                            |              |         | 449       | 51.4    | 425       | 48.6    |
| <b>Age (years)</b>                  | 9.6          | 1.0     | 9.6       | 1.0     | 9.6       | 1.0     |
| <b>Television viewing</b>           |              |         |           |         |           |         |
| My child does not watch TV          | 27           | 3.1     | 18        | 4.0     | 9         | 2.1     |
| Less than 1 hour                    | 73           | 8.4     | 37        | 8.2     | 36        | 8.5     |
| 1 hour                              | 197          | 22.5    | 102       | 22.7    | 95        | 22.4    |
| 2 hours                             | 274          | 31.4    | 140       | 31.2    | 134       | 31.5    |
| 3 hours                             | 173          | 19.8    | 91        | 20.3    | 82        | 19.3    |
| 4 hours                             | 87           | 10.0    | 44        | 9.8     | 43        | 10.1    |
| 5 hours                             | 23           | 2.6     | 11        | 2.5     | 12        | 2.8     |
| 6 hours or more                     | 20           | 2.3     | 6         | 1.3     | 14        | 3.3     |
| <b>Computer use</b>                 |              |         |           |         |           |         |
| My child does not use a computer    | 303          | 34.7    | 154       | 34.3    | 149       | 35.1    |
| Less than 1 hour                    | 233          | 26.7    | 134       | 29.8    | 99        | 23.3    |
| 1 hour                              | 194          | 22.2    | 89        | 19.8    | 105       | 24.7    |
| 2 hours                             | 89           | 10.2    | 52        | 11.6    | 37        | 8.7     |
| 3 hours                             | 35           | 4.0     | 14        | 3.1     | 21        | 4.9     |
| 4 hours                             | 11           | 1.3     | 3         | 0.7     | 8         | 1.9     |
| 5 hours                             | 5            | 0.6     | 1         | 0.2     | 4         | 1.0     |
| 6 hours or more                     | 4            | 0.5     | 2         | 0.5     | 2         | 0.5     |
| <b>Playing videogames</b>           |              |         |           |         |           |         |
| My child does not play videogames   | 449          | 51.4    | 306       | 68.2    | 143       | 33.7    |
| Less than 1 hour                    | 151          | 17.3    | 71        | 15.8    | 80        | 18.8    |
| 1 hour                              | 162          | 18.5    | 48        | 10.7    | 114       | 26.8    |
| 2 hours                             | 62           | 7.1     | 15        | 3.3     | 47        | 11.1    |

|                                                            |     |      |            |             |            |             |
|------------------------------------------------------------|-----|------|------------|-------------|------------|-------------|
| <b>3 hours</b>                                             | 25  | 2.9  | 5          | 1.1         | 20         | 4.7         |
| <b>4 hours</b>                                             | 11  | 1.3  | 1          | 0.2         | 10         | 2.4         |
| <b>5 hours</b>                                             | 4   | 0.5  | 1          | 0.2         | 3          | 0.7         |
| <b>6 hours or more</b>                                     | 10  | 1.1  | 2          | 0.5         | 8          | 1.9         |
| <b>Active transportation</b>                               |     |      |            |             |            |             |
| <b>No</b>                                                  | 377 | 43.1 | 190        | 42.3        | 187        | 44.0        |
| <b>Yes</b>                                                 | 497 | 56.9 | 259        | 57.7        | 238        | 56.0        |
| <b>Outdoor play in the past week<br/>(number of days)</b>  | 2.3 | 2.2  | <b>2.1</b> | <b>2.0</b>  | <b>2.6</b> | <b>2.3</b>  |
| <b>Participation in organized<br/>activities or sports</b> |     |      |            |             |            |             |
| <b>No</b>                                                  | 420 | 48.1 | 243        | <b>54.1</b> | <b>177</b> | <b>41.7</b> |
| <b>Yes</b>                                                 | 454 | 52.0 | 206        | <b>45.9</b> | <b>248</b> | <b>58.3</b> |
| <b>Healthy food index (score)</b>                          | 2.3 | 1.4  | 2.3        | 1.4         | 2.3        | 1.4         |
| <b>Unhealthy food index (score)</b>                        | 1.7 | 1.1  | 1.7        | 1.0         | 1.8        | 1.2         |
| <b>Household income</b>                                    |     |      |            |             |            |             |
| <b>Less than 5,000 MXN</b>                                 | 434 | 49.7 | 224        | 49.9        | 210        | 49.4        |
| <b>\$5,000 - \$9,999.99 MXN</b>                            | 294 | 33.6 | 147        | 32.7        | 147        | 34.6        |
| <b>10,000 or more MXN</b>                                  | 146 | 16.7 | 78         | 17.4        | 68         | 16.0        |

Numbers in **bold** indicate significant differences between boys and girls.

<sup>a</sup> Estimations calculated using multiple imputation estimations.
